# Supplementary material for: Estimated Reductions in Opioid Overdose Deaths With Sustainment of Public Health Interventions in 4 US States
Source: PubMed Central journal article supplement (PMC10257094; doi:10.1001/jamanetworkopen.2023.14925), 2023-06-09
Supplement: jamanetwopen-e2314925-s002.pdf [file jamanetwopen-e2314925-s002.pdf]

## Data Sharing Statement

Chhatwal. Estimated Reductions in Opioid Overdose Deaths With Sustainment of Public Health Interventions in 4 US States. *JAMA Netw Open*. Published June 09, 2023.

doi:10.1001/jamanetworkopen.2023.14925

### Data

**Data available:** Yes

**Data types:** Data (not involving human participants)

**How to access data:** All data are made available in the manuscript

**When available:** With publication

### Supporting Documents

**Document types:** None

### Additional Information

**Who can access the data:** researchers whose proposed use of the data has been approved

**Types of analyses:** for research purpose

**Mechanisms of data availability:** All data are made available in the manuscript
